# Supplementary material for: An injectable photo-crosslinking silk hydrogel system with biphasic release of BTXA and 5-Fu promotes scarless wound healing
Source: Royal Society of Chemistry journal article supplement (doi:10.1039/d5ra10037b), 2026-04-10
Supplement: d5ra10037b1.pdf [file d5ra10037b1.pdf]

## Supporting Information

### **Injectable photo-crosslinking silk hydrogel system with biphasic release of BTXA and 5-Fu promotes scarless wound healing**

Ming Xu<sup>a,b,†</sup>, Xihang Wang<sup>c,†</sup>, Ziyi Zhou<sup>a,†</sup>, Linna Wang<sup>d</sup>, Jia Zhou<sup>d</sup>, Xinyue Hu<sup>a</sup>, Yuanfei Wang<sup>e,\*</sup>, Tong Wu<sup>a,b,\*</sup>

<sup>a</sup> Medical Research Center, The Affiliated Hospital of Qingdao University, Qingdao Medical College, Qingdao University, Qingdao 266000, China

<sup>b</sup> Shandong Key Laboratory of Medical and Health Textile Materials, Collaborative Innovation Center for Eco-textiles of Shandong Province and the Ministry of Education, College of Textile & Clothing, Qingdao University, Qingdao 266071, China

<sup>c</sup> Department of Plastic Surgery, Qilu Hospital (Qingdao), Shandong University, Qingdao 266035, China

<sup>d</sup> Lanzhou Biotechnology Development Co., LTD, Lanzhou 730046, China

<sup>e</sup> Qingdao Stomatological Hospital Affiliated to Qingdao University, Qingdao 266001, China

<sup>†</sup> Ming Xu, Xihang Wang, and Ziyi Zhou contributed equally to this work.

\* Corresponding authors:

Yuanfei Wang ([wangyuanfei@qdu.edu.cn](mailto:wangyuanfei@qdu.edu.cn))

Tong Wu ([twu@qdu.edu.cn](mailto:twu@qdu.edu.cn))

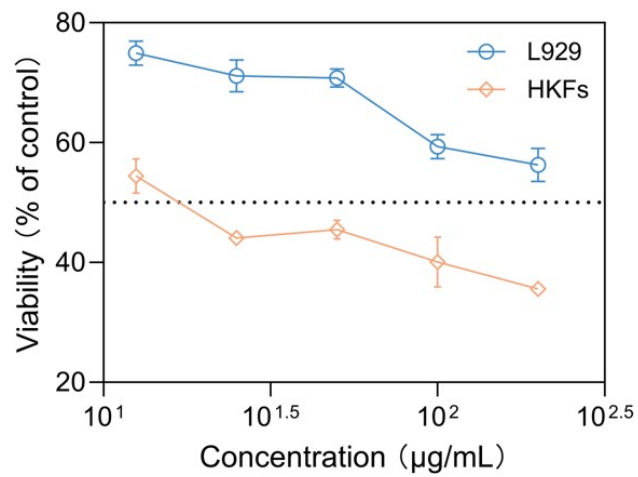

**Fig. S1.** IC<sub>50</sub> of HKFs and L929 cells. The x-axis represents the concentration of 5-Fu, and the concentration values are presented in scientific notation, where 10<sup>1</sup>=10, 10<sup>1.5</sup>≈31.62, 10<sup>2</sup>=100, and 10<sup>2.5</sup>≈316.2.

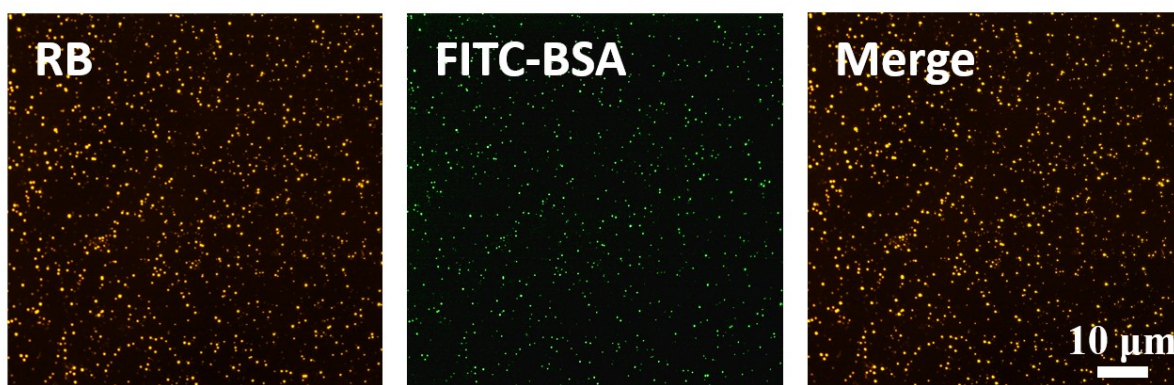

**Fig. S2.** Fluorescence staining and merged micrographs of core-shell structured microspheres (shell layer: red; core layer: green).

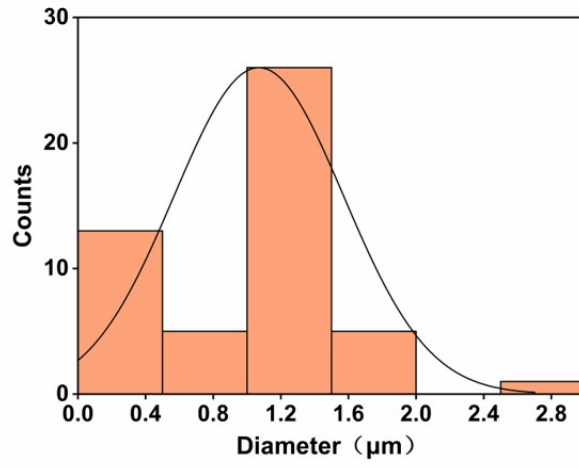

**Fig. S3.** Particle size distribution histogram of microspheres.

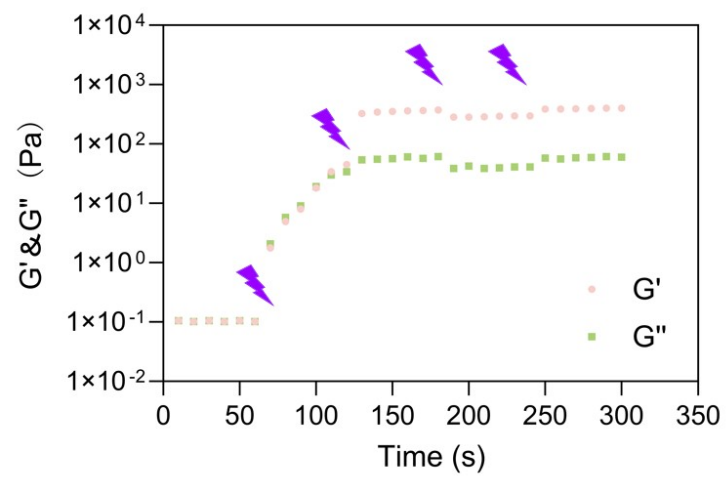

**Fig. S4.** Rheological analysis of SilMA.

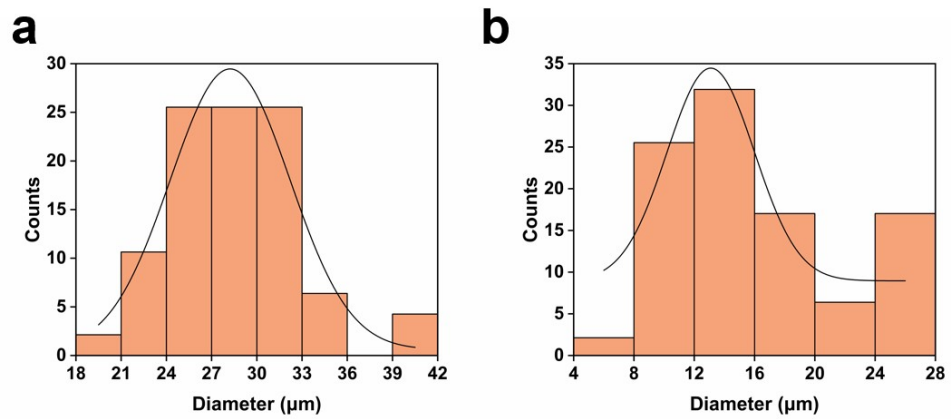

**Fig. S5.** Histogram of pore size distribution of (a) SilMA and (b) F@P-B-SilMA.

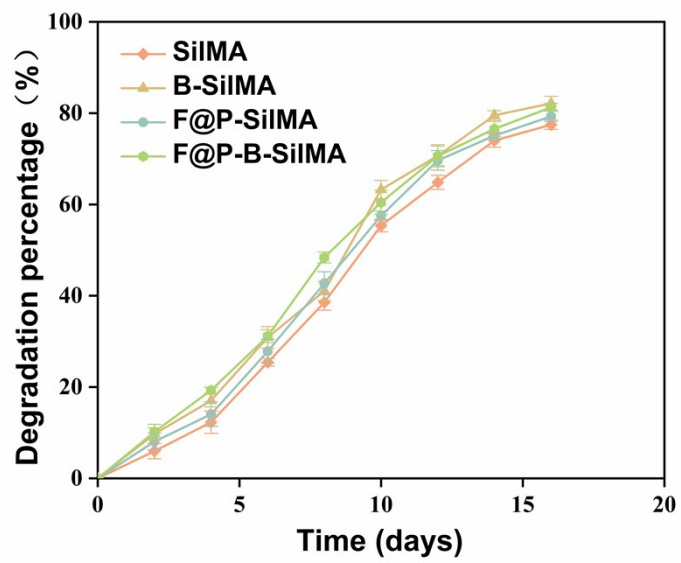

**Fig. S6.** *In vitro* degradation profiles.

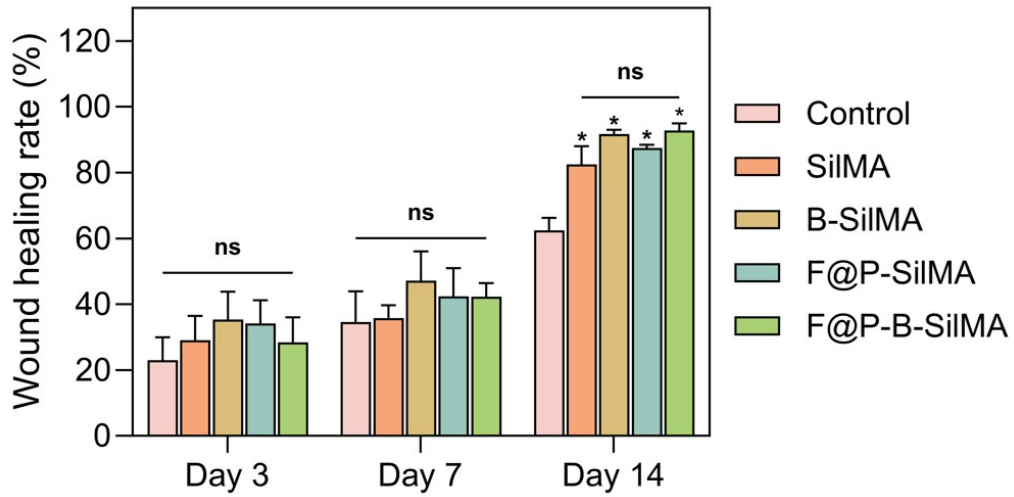

**Fig. S7.** Wound healing rate after treatment by the different groups for 3, 7, and 14 days, respectively. “ns” indicates no significant difference between groups.  $*P < 0.05$  indicates statistically significant difference when compared with the control group.

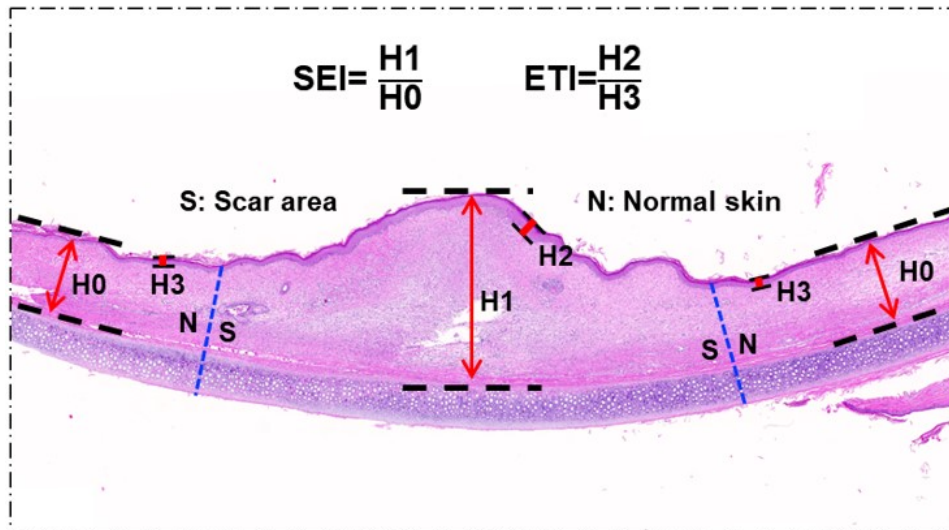

Fig. S8. Measurement schematic for SEI and ETI.
